# Supplementary material
Source: Springer Nature journal article supplement (https://www.springermedizin.de/resource/supplementary/12916_2010_322_MOESM1_ESM.pdf/9599634)

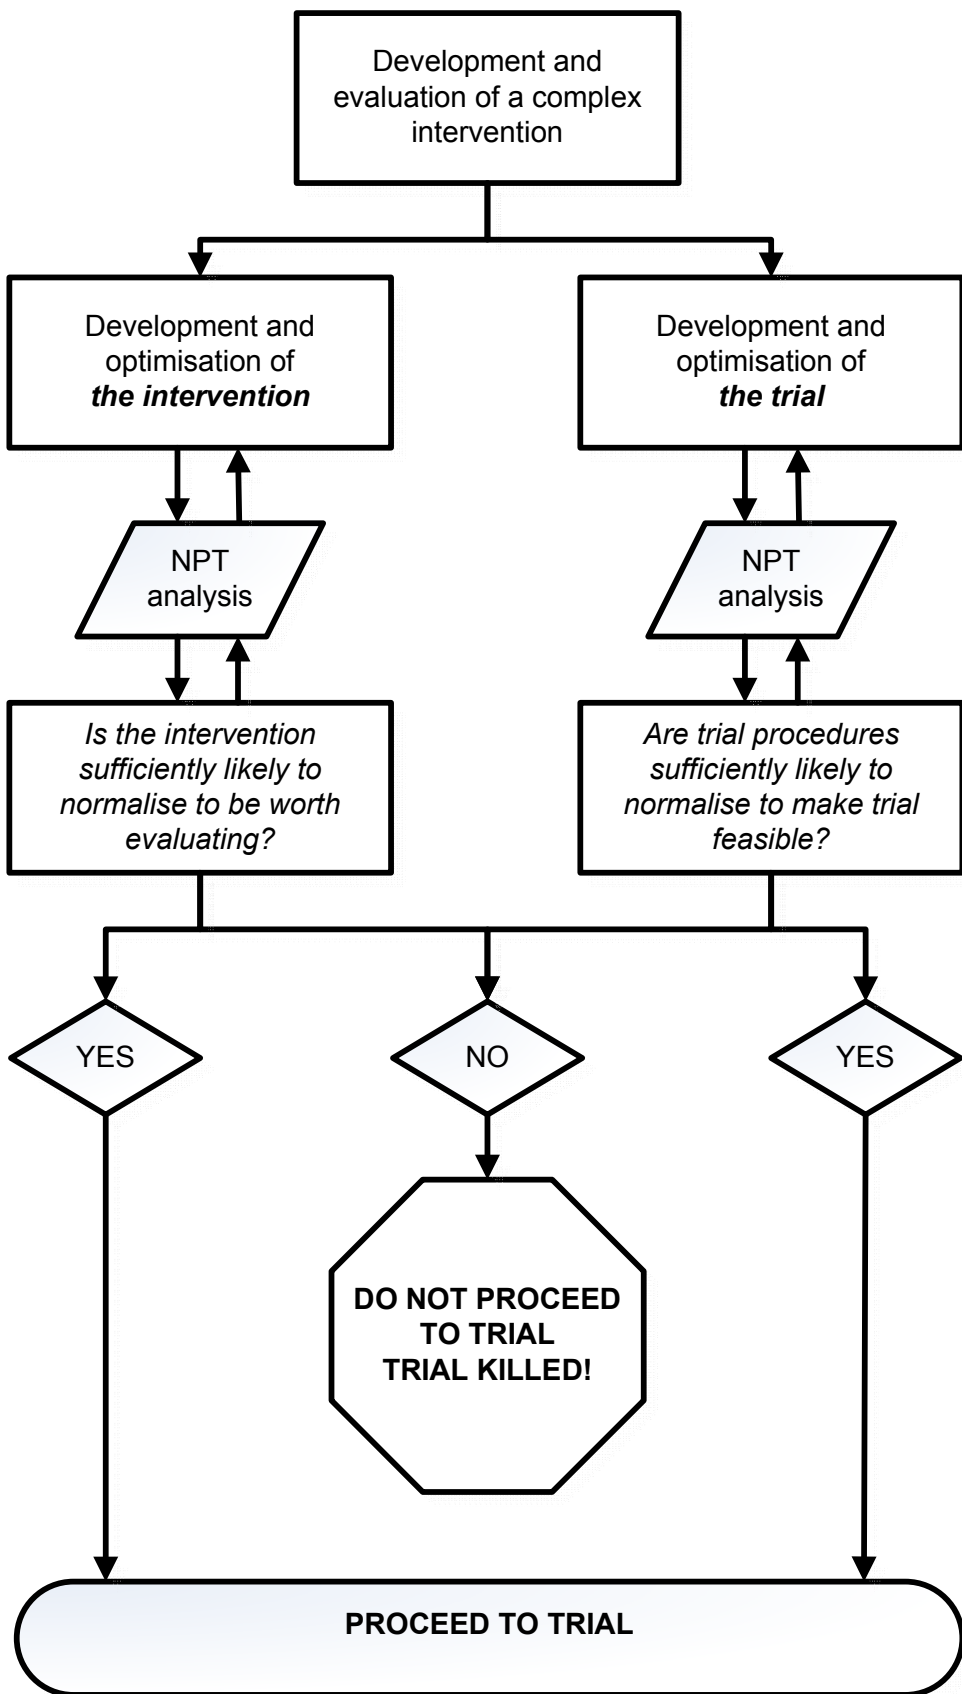

Supplement: MOESM1 [file 9599634]
